# Supplementary material for: Plasma β-III tubulin, neurofilament light chain and glial fibrillary acidic protein are associated with neurodegeneration and progression in schizophrenia
Source: PubMed Central journal article supplement (PMC7459108; doi:10.1038/s41598-020-71060-4), 2020-08-31
Supplement: 41598_2020_71060_MOESM1_ESM.pdf [file 41598_2020_71060_MOESM1_ESM.pdf]

**Plasma  $\beta$ -III Tubulin, Neurofilament Light Chain and Glial Fibrillary Acidic Protein are Associated with Neurodegeneration and Progression in Schizophrenia**

Daniela Rodrigues-Amorim<sup>1</sup>✉, Tania Rivera-Baltanás<sup>1</sup>✉, María del Carmen Vallejo-Curto<sup>1</sup>, Cynthia Rodriguez-Jamardo<sup>1</sup>, Elena de las Heras<sup>1</sup>, Carolina Barreiro-Villar<sup>1</sup>, María Blanco-Formoso<sup>1</sup>, Patricia Fernández-Palleiro<sup>1</sup>, María Álvarez-Ariza<sup>1</sup>, Marta López<sup>1</sup>, Alejandro García-Caballero<sup>2</sup>, José Manuel Olivares<sup>1\*</sup>, Carlos Spuch<sup>1\*</sup>

**Supplementary table 1:** Previous treatments of the clozapine-treated group.

| <b>Patient code</b> | <b>Current treatment</b> | <b>First treatment</b> | <b>Second treatment</b>   | <b>Illness onset</b> | <b>Duration of illness</b> |
|---------------------|--------------------------|------------------------|---------------------------|----------------------|----------------------------|
| <b>E070</b>         | <b>Clozapine</b>         | Risperidone            | Risperidone + Olanzapine  | 31                   | 14                         |
| <b>E079</b>         | <b>Clozapine</b>         | Aripiprazole           | Aripiprazole + Quetiapine | 53                   | 6                          |
| <b>E102</b>         | <b>Clozapine</b>         | Amisulpride            | Olanzapine                | 20                   | 9                          |
| <b>E117</b>         | <b>Clozapine</b>         | Risperidone            | Risperidone + Haloperidol | 25                   | 27                         |
| <b>E128</b>         | <b>Clozapine</b>         | Risperidone            | Risperidone + Amisulpride | 30                   | 30                         |
| <b>E175</b>         | <b>Clozapine</b>         | Zuclopentixol          | Aripiprazole              | 22                   | 32                         |
| <b>E176</b>         | <b>Clozapine</b>         | Haloperidol            | Risperidone               | 30                   | 11                         |
| <b>E178</b>         | <b>Clozapine</b>         | Aripiprazole           | Aripiprazole + Clotiapine | 21                   | 3                          |
| <b>E179</b>         | <b>Clozapine</b>         | Risperidone            | Risperidone + Quetiapine  | 23                   | 23                         |

**Supplementary table 2:** Equivalent amount of proteins (volume -  $\mu$ l) calculation by the a bicinchoninic acid assay (BCA).

| Patient | SZ/Ctrl      | Absorbance | Concentration $\mu$ g/ml | Volume $\mu$ l (10 $\mu$ g) |
|---------|--------------|------------|--------------------------|-----------------------------|
| E113    | FEP          | 2,136      | 4158,9                   | 2                           |
| E118    | FEP          | 2,188      | 4260,8                   | 2                           |
| E123    | FEP          | 2,527      | 4924,8                   | 2                           |
| E130    | FEP          | 1,912      | 3720,1                   | 3                           |
| E135    | FEP          | 2,889      | 6565,4                   | 2                           |
| E136    | FEP          | 2,170      | 4855,8                   | 2                           |
| E140    | FEP          | 2,672      | 6049,5                   | 2                           |
| E167    | FEP          | 2,510      | 5664,3                   | 2                           |
| E170    | FEP          | 2,560      | 5783,1                   | 2                           |
| E074    | Aripiprazole | 2,931      | 5716,2                   | 2                           |
| E075    | Aripiprazole | 2,419      | 2645,8                   | 4                           |
| E093    | Aripiprazole | 2,282      | 2495,7                   | 4                           |
| E119    | Aripiprazole | 2,400      | 2625,0                   | 4                           |
| E122    | Aripiprazole | 2,289      | 2503,4                   | 4                           |
| E126    | Aripiprazole | 2,236      | 2445,3                   | 4                           |
| E131    | Aripiprazole | 2,201      | 2406,9                   | 4                           |
| E134    | Aripiprazole | 2,056      | 2248,0                   | 4                           |
| E088    | Risperidone  | 2,212      | 2419,0                   | 4                           |
| E114    | Risperidone  | 2,173      | 2376,2                   | 4                           |
| E115    | Risperidone  | 2,085      | 4059,0                   | 2                           |
| E132    | Risperidone  | 1,523      | 1664,0                   | 6                           |
| E141    | Risperidone  | 2,262      | 2473,8                   | 4                           |
| E143    | Risperidone  | 2,108      | 2305,0                   | 4                           |
| E150    | Risperidone  | 2,349      | 2569,1                   | 4                           |
| E163    | Risperidone  | 2,195      | 2400,4                   | 4                           |
| E086    | Olanzapine   | 2,218      | 4319,5                   | 2                           |
| E094    | Olanzapine   | 2,206      | 2412,4                   | 4                           |
| E112    | Olanzapine   | 2,236      | 2445,3                   | 4                           |
| E116    | Olanzapine   | 2,224      | 2432,1                   | 4                           |
| E121    | Olanzapine   | 2,218      | 2425,6                   | 4                           |
| E149    | Olanzapine   | 2,206      | 2412,4                   | 4                           |
| E160    | Olanzapine   | 2,212      | 2419,0                   | 4                           |
| E190    | Olanzapine   | 2,243      | 2453,0                   | 4                           |
| E070    | Clozapine    | 2,138      | 4162,8                   | 2                           |
| E079    | Clozapine    | 2,272      | 4425,3                   | 2                           |
| E102    | Clozapine    | 2,025      | 3941,5                   | 3                           |
| E117    | Clozapine    | 2,648      | 5161,8                   | 2                           |
| E128    | Clozapine    | 2,101      | 4090,4                   | 2                           |
| E175    | Clozapine    | 2,401      | 5405,1                   | 2                           |
| E176    | Clozapine    | 2,310      | 5188,7                   | 2                           |
| E178    | Clozapine    | 2,196      | 4276,4                   | 2                           |
| E179    | Clozapine    | 1,989      | 3871,0                   | 3                           |
| 654     | Control      | 2,389      | 4231,4                   | 2                           |
| 655     | Control      | 2,466      | 4231,4                   | 2                           |
| 656     | Control      | 2,426      | 4231,4                   | 2                           |
| 657     | Control      | 2,165      | 4231,4                   | 2                           |
| 658     | Control      | 2,757      | 4231,4                   | 2                           |

|      |         |       |        |   |
|------|---------|-------|--------|---|
| 659  | Control | 2,363 | 4231,4 | 2 |
| 660  | Control | 2,228 | 4231,4 | 2 |
| 661  | Control | 2,574 | 4231,4 | 2 |
| 662  | Control | 2,316 | 4231,4 | 2 |
| 663  | Control | 2,389 | 4231,4 | 2 |
| 664  | Control | 2,125 | 4231,4 | 2 |
| 665  | Control | 1,875 | 4231,4 | 2 |
| 666  | Control | 2,228 | 4231,4 | 2 |
| 667  | Control | 2,015 | 4231,4 | 2 |
| 668  | Control | 2,050 | 4231,4 | 2 |
| 669  | Control | 2,260 | 4231,4 | 2 |
| 670  | Control | 2,101 | 4231,4 | 2 |
| 671  | Control | 1,780 | 4231,4 | 2 |
| 672  | Control | 2,331 | 4231,4 | 2 |
| 673  | Control | 2,247 | 4231,4 | 2 |
| 674  | Control | 2,266 | 4231,4 | 2 |
| 675  | Control | 2,436 | 4231,4 | 2 |
| 676  | Control | 2,426 | 4231,4 | 2 |
| 677  | Control | 2,115 | 4231,4 | 2 |
| 678  | Control | 2,389 | 4231,4 | 2 |
| 679  | Control | 2,115 | 4231,4 | 2 |
| 680  | Control | 2,216 | 4231,4 | 2 |
| 681  | Control | 2,301 | 4231,4 | 2 |
| 682  | Control | 2,280 | 4231,4 | 2 |
| 683  | Control | 2,062 | 4231,4 | 2 |
| 684  | Control | 1,969 | 4231,4 | 2 |
| S254 | Control | 2,720 | 2975,7 | 3 |
| S255 | Control | 2,739 | 2996,5 | 3 |
| S256 | Control | 2,634 | 2881,4 | 3 |
| S259 | Control | 2,701 | 2954,8 | 3 |
| S261 | Control | 2,683 | 2935,1 | 3 |
| S262 | Control | 2,666 | 2916,5 | 3 |
| S264 | Control | 2,634 | 2881,4 | 3 |
| S268 | Control | 2,619 | 2865,0 | 3 |
| S288 | Control | 2,780 | 3041,4 | 3 |

**Legend:** SZ – schizophrenia; Ctrl - Control; FEP - first-episode psychosis.

**Supplementary table 3:** Summary One-way ANOVA and Bonferroni's multiple comparisons tests results.

| <b>Duration of illness</b>                   |                   |                        |                     |                  |                         |
|----------------------------------------------|-------------------|------------------------|---------------------|------------------|-------------------------|
| <b>ANOVA Summary</b>                         |                   |                        |                     | <b>F= 0.1973</b> | <b>P=0.8974</b>         |
| <b>Bonferroni's multiple comparison test</b> | <b>Mean Diff.</b> | <b>95% CI of diff.</b> | <b>Significance</b> | <b>Summary</b>   | <b>Adjusted P Value</b> |
| Aripiprazole vs. Risperidone                 | -0.6250           | -14.77 to 13.52        | No                  | ns               | >0.9999                 |
| Aripiprazole vs. Olanzapine                  | -1.500            | -15.64 to 12.64        | No                  | ns               | >0.9999                 |
| Aripiprazole vs. Clozapine                   | -3.472            | -17.22 to 10.27        | No                  | ns               | >0.9999                 |
| Risperidone vs. Olanzapine                   | -0.8750           | -15.02 to 13.27        | No                  | ns               | >0.9999                 |
| Risperidone vs. Clozapine                    | -2.847            | -16.59 to 10.90        | No                  | ns               | >0.9999                 |
| Olanzapine vs. Clozapine                     | -1.972            | -15.72 to 11.77        | No                  | ns               | >0.9999                 |
| <b>Dose equivalencies</b>                    |                   |                        |                     |                  |                         |
| <b>ANOVA Summary</b>                         |                   |                        |                     | <b>F= 2.413</b>  | <b>P=0.0870</b>         |
| <b>Bonferroni's multiple comparison test</b> | <b>Mean Diff.</b> | <b>95% CI of diff.</b> | <b>Significance</b> | <b>Summary</b>   | <b>Adjusted P Value</b> |
| Aripiprazole vs. Risperidone                 | -101.7            | -300.8 to 97.49        | No                  | ns               | 0.9543                  |
| Aripiprazole vs. Olanzapine                  | 85.83             | -113.3 to 285.0        | No                  | ns               | >0.9999                 |
| Aripiprazole vs. Clozapine                   | -23.89            | -217.4 to 169.7        | No                  | ns               | >0.9999                 |
| Risperidone vs. Olanzapine                   | 187.5             | -11.66 to 386.7        | No                  | ns               | 0.0745                  |
| Risperidone vs. Clozapine                    | 77.78             | -115.8 to 217.3        | No                  | ns               | >0.9999                 |
| Olanzapine vs. Clozapine                     | -109.7            | -303.3 to 83.83        | No                  | ns               | 0.7157                  |
| <b>Illness onset</b>                         |                   |                        |                     |                  |                         |
| <b>ANOVA Summary</b>                         |                   |                        |                     | <b>F=2.857</b>   | <b>P=0.0556</b>         |
| <b>Bonferroni's multiple comparison test</b> | <b>Mean Diff.</b> | <b>95% CI of diff.</b> | <b>Significance</b> | <b>Summary</b>   | <b>Adjusted P Value</b> |
| Aripiprazole vs. Risperidone                 | -13.00            | -26.97 to 0.9662       | No                  | ns               | 0.0798                  |
| Aripiprazole vs. Olanzapine                  | -1.446            | -14.97 to 12.08        | No                  | ns               | >0.9999                 |
| Aripiprazole vs. Clozapine                   | -4.905            | -18.07 to 8.263        | No                  | ns               | >0.9999                 |
| Risperidone vs. Olanzapine                   | 11.55             | -1.969 to 25.08        | No                  | ns               | 0.1315                  |
| Risperidone vs. Clozapine                    | 8.095             | -5.072 to 21.26        | No                  | ns               | 0.5486                  |
| Olanzapine vs. Clozapine                     | -3.458            | -16.15 to 9.236        | No                  | ns               | >0.9999                 |

**Legend:** One-way ANOVA followed by Bonferroni post-hoc test: comparison between patients treated with antipsychotics \*Statistical significance:  $P \leq 0.05$ .

Supplementary figure 1: Original western blots.

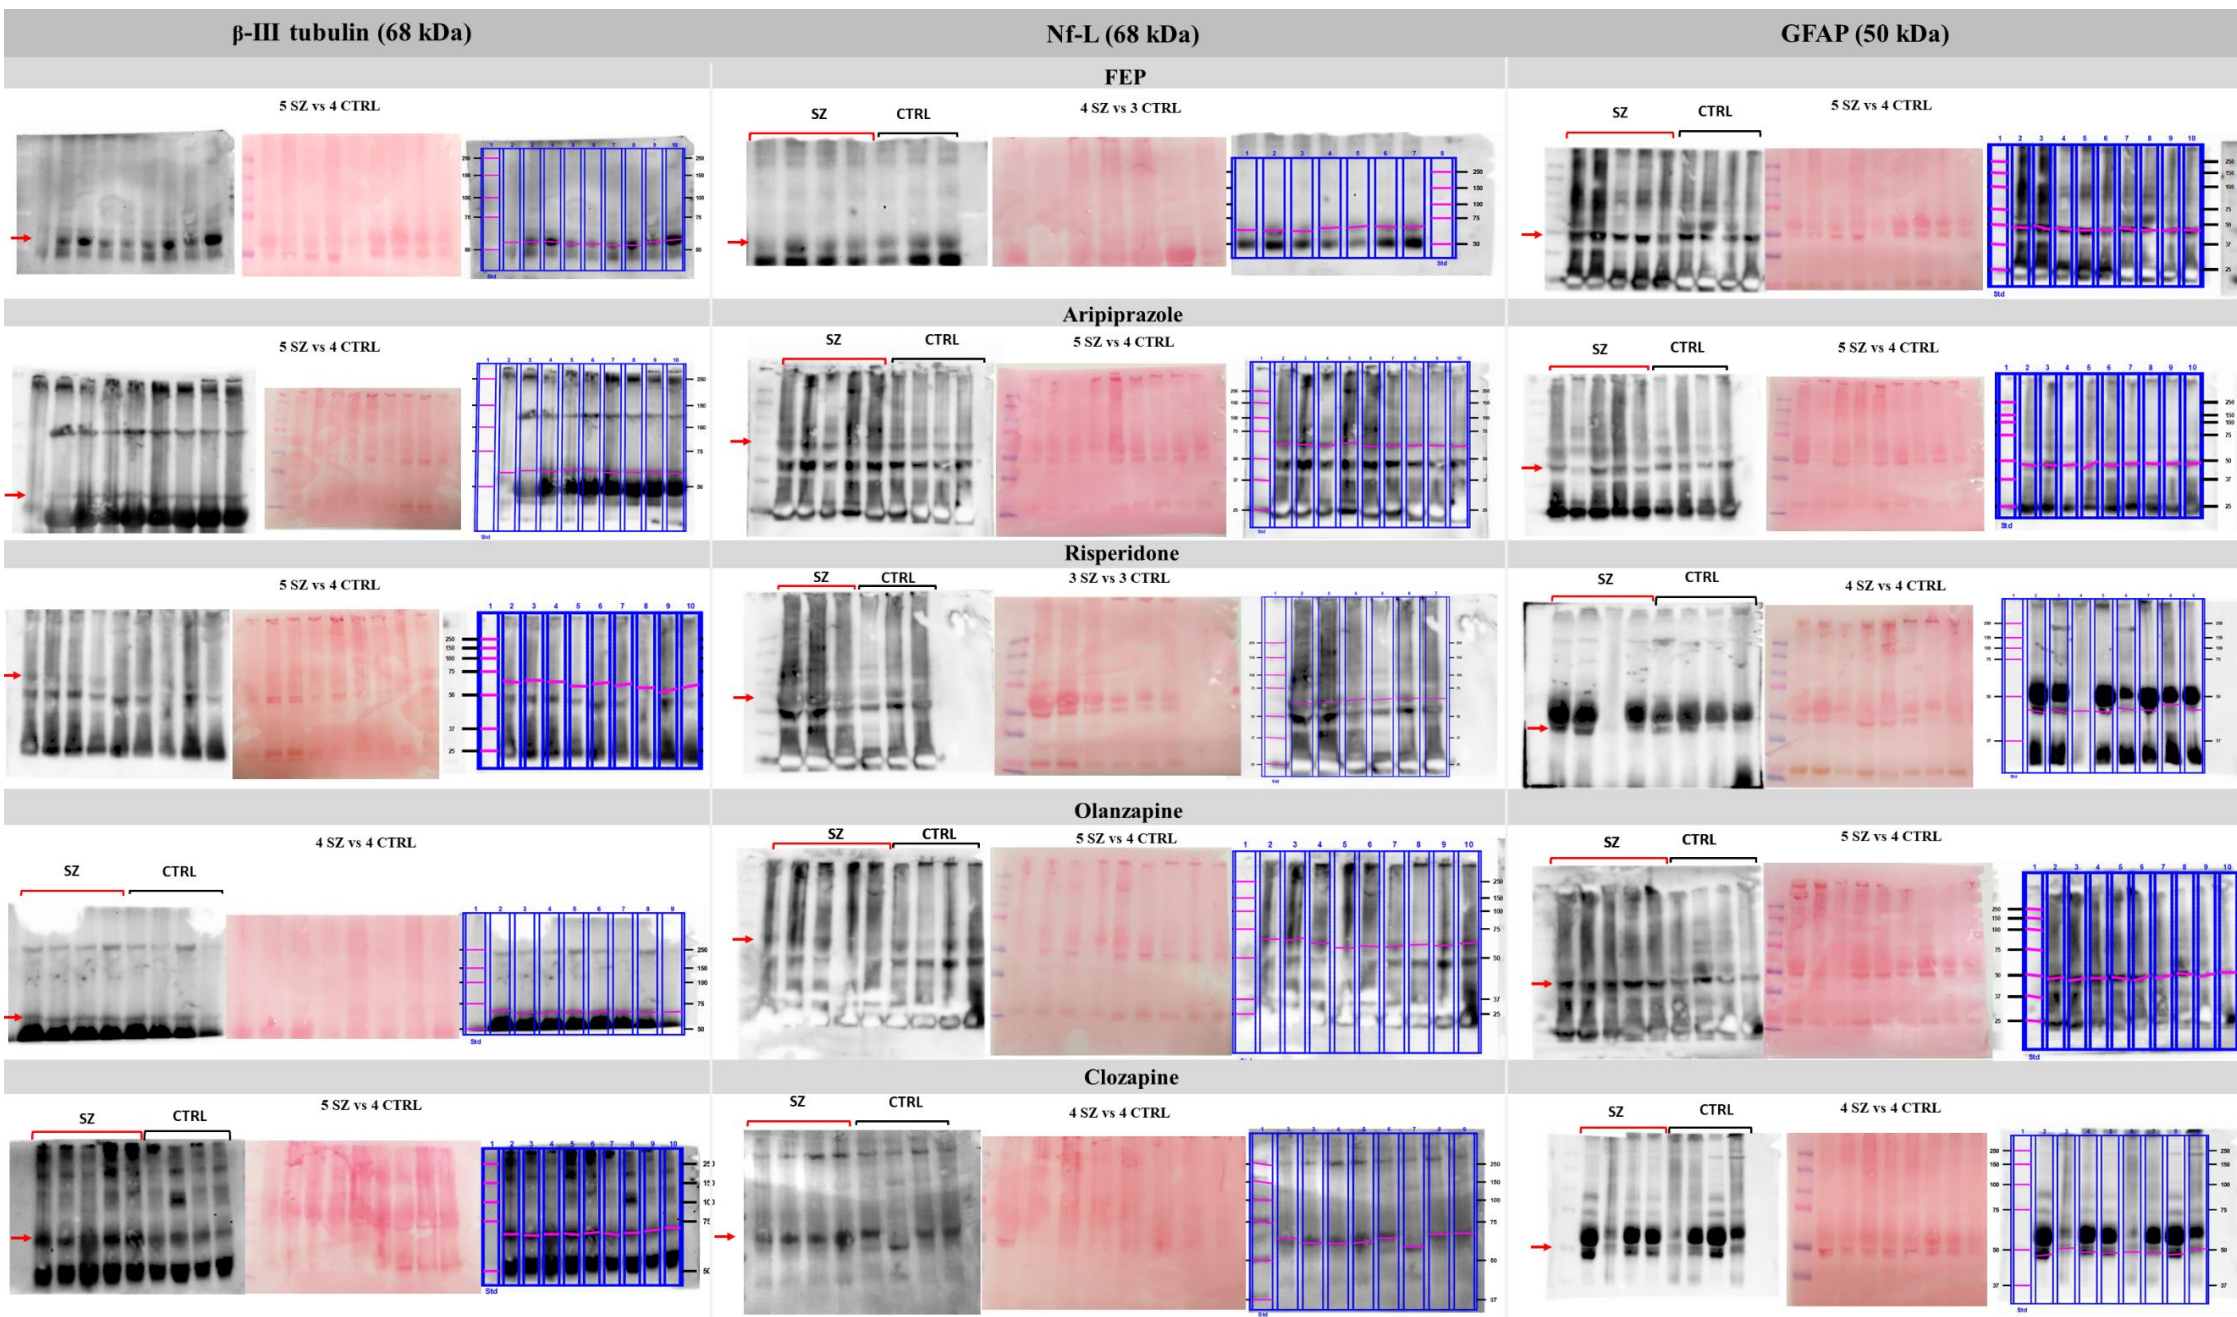

**Supplementary table 4:** Summary One-way ANOVA and Bonferroni's multiple comparisons tests results for GFAP ELISA.

| GFAP                                  |            |                     |              |          |                  |
|---------------------------------------|------------|---------------------|--------------|----------|------------------|
| ANOVA Summary                         |            |                     |              | F= 4.950 | P=0.0006         |
| Bonferroni's multiple comparison test | Mean Diff. | 95% CI of diff.     | Significance | Summary  | Adjusted P Value |
| FEP vs. Controls                      | -0,009998  | -0,08676 to 0,06676 | No           | ns       | > 0.9999         |
| Aripiprazole vs. Controls             | -0,02356   | -0,1041 to 0,05702  | No           | ns       | > 0.9999         |
| Risperidone vs. Controls              | -0,01657   | -0,09715 to 0,06401 | No           | ns       | > 0.9999         |
| Olanzapine vs. Controls               | 0,002630   | -0,07795 to 0,08321 | No           | ns       | > 0.9999         |
| Clozapine vs. Controls                | -0,1412    | -0,2180 to -0,06448 | Yes          | ****     | < 0.0001         |

**Legend:** One-way ANOVA followed by Bonferroni post-hoc test: comparison between patients treated with antipsychotics and controls \*Statistical significance:  $P \leq 0.05$ .

**Supplementary figure 2:** Plasma levels of GFAP measured by ELISA.

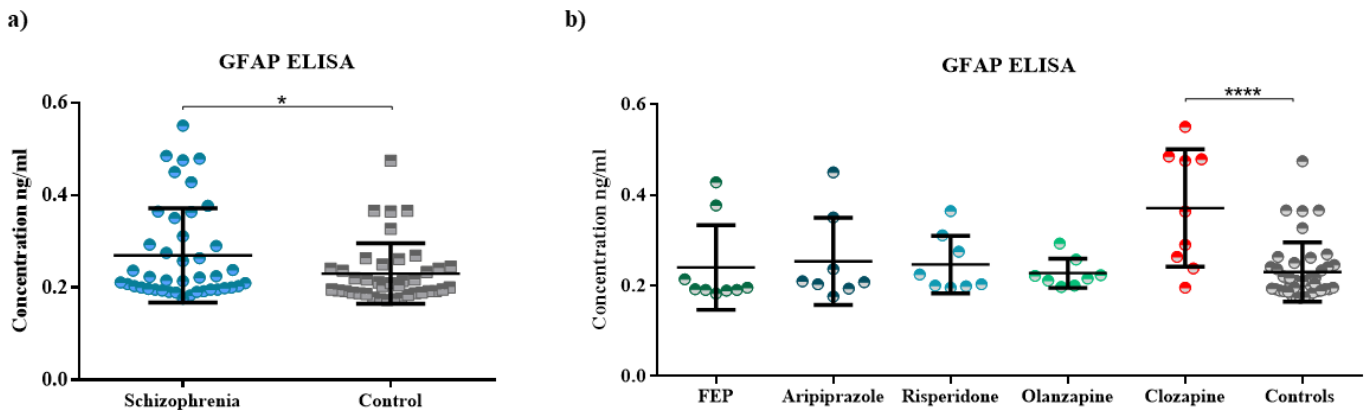

**Legend:** Scatterplots showing the plasma levels of GFAP. a) Scatterplot of levels of GFAP that reveals statistical significance between patients with schizophrenia and the control group using unpaired two-tailed T-test ( $P=0.0407$ ). b) Scatterplot of levels of GFAP that showing a significant result between clozapine-treated patients and the control group using one-way ANOVA multiple comparison ( $P < 0.0001$ ).
